# Supplementary material
Source: PubMed Central journal article supplement (PMC5014031)
Supplement: rsbl20160365supp1.pdf [file rsbl20160365supp1.pdf]

## **ELECTRONIC SUPPLEMENTARY MATERIAL**

### **Nepotism and subordinate tenure in a cooperative breeder**

Martha J. Nelson-Flower, Amanda R. Ridley

#### **METHODS**

Forty-five wild groups of southern pied babblers were habituated to an observer 2 – 3 m away. Habituated groups were visited at least twice per week for four-hour observation sessions in the mornings and two-hour observation sessions in the evenings. Adults (at least one year old) could be discerned by their plumage [1]. Dominance status within groups was determined using behavioural cues and, for females, vocalizations during inter-group conflicts [2]. Microsatellite genotyping was used with life-history data to construct a pedigree [3]. The majority of young (95.2%) were the offspring of the dominant pair and extra-group parentage was never observed [3]. There was no sex-bias in the age or distance of dispersal, or in the resulting population fine-scale genetic structure [4,5].

We originally had 478 subordinate tenures of 459 subordinates living in 41 groups. We excluded subordinates if their tenure was ongoing at the end of the observation period ( $n = 53$ ) or if their tenure finished because they had likely died (vanished having never been observed prospecting or corpse found,  $n = 247$ ). To understand the effects of subordinate tenure length on the likelihood of acquiring dominance, we asked whether the subordinate acquired dominance or not in the immediate period (within 90 days) after its subordinate tenure ended. We included only those individuals for which definite assignment of dominance status was possible, resulting in a dataset of 103 subordinate tenures of 90 birds from 31 groups (Data table 1 in ESM2).

To investigate subordinate tenure length, we classified subordinates based on their relationship to the dominant pair at the end of their tenure: living with two related dominants (almost always parents), a related same-sex dominant but unrelated opposite-sex dominant, an unrelated same-sex dominant but related opposite-sex dominant, or two unrelated dominants. We first used GLMMs to investigate the subordinate tenure length of subordinates living with one related and one unrelated dominant ( $n = 85$ ), after excluding subordinates with ongoing tenures or those that had likely died. We calculated subordinate tenure as the number of days that an individual remained subordinate after starting to live with the unrelated dominant. We restricted each subordinate to appear in the dataset only once, removing extra (later) tenures that fit the above criteria ( $n = 4$ ), leaving 81 subordinate tenures in the dataset (Data table 2 in ESM2). This dataset included subordinates that left natal groups

to join close relatives (full siblings or parents) in non-natal groups ( $n = 14$ ); there was no sex bias in leaving the natal group ( $n = 6$  females, 8 males) or in following a same- versus opposite-sex relative (Nelson-Flower & Ridley, in prep). There was no difference in the age at which subordinate males and females began living with unrelated dominant males or females.

Finally, we compared tenure length of subordinates living with various combinations of related or unrelated dominants (both related, opposite-sex unrelated, same-sex unrelated, both unrelated). We again calculated subordinate tenure as the number of days that an individual remained subordinate after starting to live with an unrelated dominant. For those subordinates living with two unrelated dominants we used the day the second unrelated dominant arrived in the group as the starting point. We also wanted to include in this comparison those individuals that finished their subordinate tenures while still living with both parents. Mean age of subordinates at the start of tenure with an unrelated dominant was  $443.6 \pm 25.2$  days. Therefore, for subordinates that lived with parents for their entire tenure, we subtracted 444 days from the time they stayed as subordinates (if these subordinates stayed less than 444 days as subordinates they were excluded from the analysis:  $n = 28$ ). We also excluded second or later tenures of subordinates in order to avoid pseudoreplication ( $n = 16$ ). Overall we examined 134 subordinate tenures (Data table 3 in ESM2). We used Wilcoxon rank sum tests to compare tenure between the different classes of subordinate and used Bonferroni's correction for multiple comparisons. We examined males and females separately. We did not correct for the subordinate's age in this analysis, though the previous analysis using GLMMs did include subordinate age.

Statistical analysis was performed within R v. 3.2.2 [6] using R packages 'lme4' v. 1.1-10 [7] and 'glmmADMB' v. 0.8.0 [8] for Generalized Linear Mixed Models. We assessed model fit using Akaike's information criterion adjusted for small sample sizes (AICc; [9]). We first specified a global model including all terms of interest; submodels were then derived from this [10]. When one or more submodels scored within two AICc units of the best submodel, we employed model averaging using 'MuMIn' v.1.15.1 [11]. Continuous variables were centred and scaled [10]. Non-natal subordinates are uncommon in large groups (M.J. Nelson-Flower, unpublished data); therefore, natal group presence and group size were not included in any models together.

## RESULTS

| Intercept    | Sex | Tenure length | Sex * tenure length | Degrees of freedom | Log likelihood | AICc         | delta    | weight       |
|--------------|-----|---------------|---------------------|--------------------|----------------|--------------|----------|--------------|
| <b>1.049</b> | +   | <b>0.968</b>  | +                   | <b>6</b>           | <b>-52.650</b> | <b>118.2</b> | <b>0</b> | <b>0.830</b> |
| 1.191        | +   | 2.288         |                     | 5                  | -55.750        | 122.1        | 3.94     | 0.115        |
| 0.833        |     | 2.336         |                     | 4                  | -57.596        | 123.6        | 5.43     | 0.055        |
| 0.916        | +   |               |                     | 4                  | -65.815        | 140.0        | 21.86    | 0            |
|              |     |               |                     | 3                  | -67.202        | 140.6        | 22.47    | 0            |

| Parameter                         | Estimate      | Standard Error | Confidence Interval | P-value      |
|-----------------------------------|---------------|----------------|---------------------|--------------|
| <b>Intercept</b>                  | <b>1.0492</b> | <b>0.3753</b>  | <b>0.397, 2.007</b> | <b>0.005</b> |
| Tenure length                     | 0.9684        | 0.7738         | -0.513, 2.632       | 0.211        |
| Sex (male)                        | -0.5499       | 0.5401         | -1.607, 0.568       | 0.309        |
| <b>Tenure length * sex (male)</b> | <b>3.2498</b> | <b>1.4596</b>  | <b>0.648, 6.586</b> | <b>0.026</b> |

**Table S1** Results of GLMM models with binomial error distributions and logit-link functions investigating acquisition of dominance and how it is affected by subordinate sex interacted with subordinate tenure length. The full set of models is shown (top), and the significant terms from the minimal model ( $> \Delta$  AICc 2; bottom). Dataset includes 103 tenures of 90 subordinates in 31 groups.

| Intercept    | Age at start  | Unrelated dominant | Sex | Sex * unrelated dominant | Natal group | Age at start * sex | Group size | Sex * group size | Sex * natal group | Degrees of freedom | Log likelihood  | AICc          | delta       | weight       |
|--------------|---------------|--------------------|-----|--------------------------|-------------|--------------------|------------|------------------|-------------------|--------------------|-----------------|---------------|-------------|--------------|
| <b>5.810</b> | <b>-0.827</b> | +                  | +   | +                        |             |                    |            |                  |                   | <b>7</b>           | <b>-541.954</b> | <b>1099.4</b> | <b>0</b>    | <b>0.244</b> |
| <b>5.601</b> | <b>-0.755</b> | +                  | +   | +                        | +           |                    |            |                  |                   | <b>8</b>           | <b>-541.577</b> | <b>1101.2</b> | <b>1.71</b> | <b>0.104</b> |
| 5.810        | -0.809        | +                  | +   | +                        |             | +                  |            |                  |                   | 8                  | -541.949        | 1101.9        | 2.46        | 0.071        |
| 5.754        | -0.875        | +                  | +   | +                        |             |                    | +          |                  |                   | 9                  | -540.826        | 1102.2        | 2.74        | 0.062        |
| 5.454        | -0.748        | +                  |     |                          | +           |                    |            |                  |                   | 6                  | -544.728        | 1102.6        | 3.15        | 0.050        |
| 5.732        | -0.837        |                    |     |                          |             |                    |            |                  |                   | 4                  | -547.058        | 1102.6        | 3.20        | 0.049        |
| 5.869        | -0.871        | +                  |     |                          |             |                    |            |                  |                   | 5                  | -545.962        | 1102.7        | 3.28        | 0.047        |
| 5.990        | -0.844        | +                  | +   | +                        |             |                    | +          | +                |                   | 11                 | -538.646        | 1103.1        | 3.68        | 0.039        |
| 5.378        | -0.727        |                    |     |                          | +           |                    |            |                  |                   | 5                  | -546.255        | 1103.3        | 3.87        | 0.035        |
| 5.678        | -0.744        | +                  | +   |                          | +           |                    |            |                  |                   | 7                  | -543.945        | 1103.4        | 3.98        | 0.033        |

| Intercept | Age at start | Unrelated dominant | Sex | Sex * unrelated dominant | Natal group | Age at start * sex | Group size | Sex * group size | Sex * natal group | Degrees of freedom | Log likelihood | AICc   | delta | weight |
|-----------|--------------|--------------------|-----|--------------------------|-------------|--------------------|------------|------------------|-------------------|--------------------|----------------|--------|-------|--------|
| 6.096     | -0.851       | +                  | +   |                          |             |                    |            |                  |                   | 6                  | -545.198       | 1103.5 | 4.09  | 0.032  |
| 5.592     | -0.712       | +                  | +   | +                        | +           | +                  |            |                  |                   | 9                  | -541.549       | 1103.6 | 4.19  | 0.030  |
| 5.603     | -0.756       | +                  | +   | +                        | +           |                    |            |                  | +                 | 9                  | -541.577       | 1103.7 | 4.25  | 0.029  |
| 5.754     | -0.871       | +                  | +   | +                        |             | +                  | +          |                  |                   | 10                 | -540.826       | 1104.8 | 5.35  | 0.017  |
| 5.743     | -0.835       |                    | +   |                          |             |                    |            |                  |                   | 5                  | -547.05        | 1104.9 | 5.46  | 0.016  |
| 5.892     | -0.884       | +                  |     |                          |             |                    | +          |                  |                   | 7                  | -544.857       | 1105.2 | 5.81  | 0.013  |
| 5.385     | -0.727       |                    | +   |                          | +           |                    |            |                  |                   | 6                  | -546.253       | 1105.6 | 6.20  | 0.011  |
| 6.002     | -0.772       | +                  | +   | +                        |             | +                  | +          | +                |                   | 12                 | -538.559       | 1105.7 | 6.26  | 0.011  |
| 5.688     | -0.850       |                    |     |                          |             |                    | +          |                  |                   | 6                  | -546.327       | 1105.8 | 6.35  | 0.010  |
| 5.665     | -0.684       | +                  | +   |                          | +           | +                  |            |                  |                   | 8                  | -543.898       | 1105.8 | 6.35  | 0.010  |
| 6.127     | -0.867       | +                  | +   |                          |             |                    | +          |                  |                   | 8                  | -543.917       | 1105.8 | 6.39  | 0.010  |
| 5.647     | -0.737       | +                  | +   |                          | +           |                    |            |                  | +                 | 8                  | -543.938       | 1105.9 | 6.43  | 0.010  |
| 6.096     | -0.836       | +                  | +   |                          |             | +                  |            |                  |                   | 7                  | -545.195       | 1105.9 | 6.48  | 0.010  |
| 5.566     | -0.700       | +                  | +   | +                        | +           | +                  |            |                  | +                 | 10                 | -541.545       | 1106.2 | 6.79  | 0.008  |
| 5.745     | -0.810       |                    | +   |                          |             | +                  |            |                  |                   | 6                  | -547.040       | 1107.2 | 7.77  | 0.005  |
| 5.588     | -0.776       |                    | +   |                          | +           |                    |            |                  | +                 | 7                  | -546.034       | 1107.6 | 8.16  | 0.004  |
| 5.434     |              | +                  | +   | +                        | +           |                    |            |                  |                   | 7                  | -546.035       | 1107.6 | 8.16  | 0.004  |
| 5.364     | -0.647       |                    | +   |                          | +           | +                  |            |                  |                   | 7                  | -546.164       | 1107.9 | 8.42  | 0.004  |
| 6.381     | -0.844       | +                  | +   |                          |             |                    | +          | +                |                   | 10                 | -542.469       | 1108.1 | 8.64  | 0.003  |
| 5.696     | -0.848       |                    | +   |                          |             |                    | +          |                  |                   | 7                  | -546.321       | 1108.2 | 8.73  | 0.003  |
| 5.603     | -0.659       | +                  | +   |                          | +           | +                  |            |                  | +                 | 9                  | -543.875       | 1108.3 | 8.84  | 0.003  |
| 6.127     | -0.868       | +                  | +   |                          |             | +                  | +          |                  |                   | 9                  | -543.916       | 1108.4 | 8.92  | 0.003  |
| 5.931     |              | +                  | +   | +                        |             |                    |            |                  |                   | 6                  | -547.636       | 1108.4 | 8.96  | 0.003  |
| 5.263     |              | +                  |     |                          | +           |                    |            |                  |                   | 5                  | -548.824       | 1108.4 | 9.01  | 0.003  |
| 5.180     |              |                    |     |                          | +           |                    |            |                  |                   | 4                  | -550.034       | 1108.6 | 9.15  | 0.003  |
| 5.545     |              | +                  | +   |                          | +           |                    |            |                  |                   | 6                  | -547.990       | 1109.1 | 9.67  | 0.002  |
| 5.254     |              | +                  | +   | +                        | +           |                    |            |                  | +                 | 8                  | -545.815       | 1109.6 | 10.19 | 0.001  |
| 5.553     | -0.727       |                    | +   |                          | +           | +                  |            |                  | +                 | 8                  | -546.011       | 1110.0 | 10.58 | 0.001  |

| Intercept | Age at start | Unrelated dominant | Sex | Sex * unrelated dominant | Natal group | Age at start * sex | Group size | Sex * group size | Sex * natal group | Degrees of freedom | Log likelihood | AICc   | delta | weight |
|-----------|--------------|--------------------|-----|--------------------------|-------------|--------------------|------------|------------------|-------------------|--------------------|----------------|--------|-------|--------|
| 5.698     | -0.835       |                    | +   |                          |             | +                  | +          |                  |                   | 8                  | -546.318       | 1110.6 | 11.19 | 0.001  |
| 6.390     | -0.791       | +                  | +   |                          |             | +                  | +          | +                |                   | 11                 | -542.435       | 1110.7 | 11.25 | 0.001  |
| 5.206     |              |                    | +   |                          | +           |                    |            |                  |                   | 5                  | -550.017       | 1110.8 | 11.39 | 0.001  |
|           |              |                    |     |                          |             |                    |            |                  |                   | 3                  | -552.379       | 1111.1 | 11.63 | 0.001  |
| 5.382     |              | +                  | +   |                          | +           |                    |            |                  | +                 | 7                  | -547.804       | 1111.1 | 11.70 | 0.001  |
| 5.841     | -0.821       |                    | +   |                          |             |                    | +          | +                |                   | 9                  | -545.355       | 1111.2 | 11.80 | 0.001  |
| 5.988     |              | +                  | +   | +                        |             |                    | +          |                  |                   | 8                  | -546.863       | 1111.7 | 12.28 | 0.001  |
| 6.223     |              | +                  | +   |                          |             |                    |            |                  |                   | 5                  | -550.491       | 1111.8 | 12.34 | 0.001  |
| 5.925     |              | +                  |     |                          |             |                    |            |                  |                   | 4                  | -551.656       | 1111.8 | 12.40 | 0      |
| 6.228     |              | +                  | +   | +                        |             |                    | +          | +                |                   | 10                 | -544.611       | 1112.4 | 12.92 | 0      |
| 5.856     |              |                    | +   |                          |             |                    |            |                  |                   | 4                  | -552.254       | 1113.0 | 13.59 | 0      |
| 5.183     |              |                    | +   |                          | +           |                    |            |                  | +                 | 6                  | -550.014       | 1113.2 | 13.72 | 0      |
| 5.855     | -0.763       |                    | +   |                          |             | +                  | +          | +                |                   | 10                 | -545.303       | 1113.7 | 14.31 | 0      |
| 5.876     |              |                    |     |                          |             |                    | +          |                  |                   | 5                  | -551.613       | 1114.0 | 14.58 | 0      |
| 6.317     |              | +                  | +   |                          |             |                    | +          |                  |                   | 7                  | -549.270       | 1114.1 | 14.63 | 0      |
| 6.051     |              | +                  |     |                          |             |                    | +          |                  |                   | 6                  | -550.539       | 1114.2 | 14.77 | 0      |
| 6.581     |              | +                  | +   |                          |             |                    | +          | +                |                   | 9                  | -547.714       | 1116.0 | 16.52 | 0      |

| Parameter                                     | Estimate      | Standard Error | Confidence Interval   | P-value           |
|-----------------------------------------------|---------------|----------------|-----------------------|-------------------|
| <b>Intercept</b>                              | <b>5.748</b>  | <b>0.279</b>   | <b>5.194, 6.302</b>   | <b>&lt; 0.001</b> |
| <b>Age at start</b>                           | <b>-0.806</b> | <b>0.228</b>   | <b>-1.259, -0.353</b> | <b>&lt; 0.001</b> |
| Unrelated dominant (same)                     | -0.129        | 0.295          | -0.716, 0.458         | 0.667             |
| Sex (male)                                    | 0.088         | 0.303          | -0.516, 0.692         | 0.776             |
| <b>Unrelated dominant (same) * Sex (male)</b> | <b>-1.391</b> | <b>0.530</b>   | <b>-2.446, -0.335</b> | <b>0.010</b>      |
| Natal group (natal)                           | 0.086         | 0.221          | -0.360, 0.937         | 0.383             |

**Table S2** Results of GLMM models with negative binomial error distributions and logit-link functions investigating subordinate tenure (days) and how it is affected by subordinate sex interacted with: the presence of an unrelated dominant of the same or opposite sex, subordinate age in days at the start of the period of interest, the presence of the natal group, and size of the group. The size of the group and whether the tenure occurred in a natal group or not

were highly correlated and therefore were not included in the same models. The full set of models is shown (top), and the significant terms from the minimal model (within  $\Delta AICc$  2; bottom). Dataset includes 81 subordinate tenures in 27 groups.

## REFERENCES

1. Ridley, A. R. & Raihani, N. J. 2007 Variable postfledging care in a cooperative bird : causes and consequences. *Behav. Ecol.* **18**, 994–1000. (doi:10.1093/beheco/arm074)
2. Golabek, K. A. & Radford, A. N. 2013 Chorus-call classification in the southern pied babbler: multiple call types given in overlapping contexts. *Behaviour* **150**, 691–712. (doi:10.1163/1568539X-00003074)
3. Nelson-Flower, M. J., Hockey, P. A. R., O’Ryan, C., Raihani, N. J., du Plessis, M. A. & Ridley, A. R. 2011 Monogamous dominant pairs monopolize reproduction in the cooperatively breeding pied babbler. *Behav. Ecol.* **22**, 559–565. (doi:10.1093/beheco/arr018)
4. Raihani, N. J., Nelson-Flower, M. J., Golabek, K. A. & Ridley, A. R. 2010 Routes to breeding in cooperatively breeding pied babblers *Turdoides bicolor*. *J. Avian Biol.* **41**, 681–686. (doi:10.1111/j.1600-048X.2010.05211.x)
5. Nelson-Flower, M. J., Hockey, P. A. R., O’Ryan, C. & Ridley, A. R. 2012 Inbreeding avoidance mechanisms: dispersal dynamics in cooperatively breeding southern pied babblers. *J. Anim. Ecol.* **81**, 876–883. (doi:10.1111/j.1365-2656.2012.01983.x)
6. R Core Team 2015 R: A language and environment for statistical computing.
7. Bates, D., Maechler, M., Bolker, B. M. & Walker, S. 2015 Fitting linear mixed-effects models using lme4. *J. Stat. Softw.* **67**, 1–48. (doi:10.18637/jss.v067.i01)
8. Skaug, H., Fournier, D., Bolker, B., Magnusson, A. & Nielsen, A. 2014 Generalized Linear Mixed Models using AD Model Builder.
9. Burnham, K. P. & Anderson, D. R. 2002 *Model selection and multimodel inference*. 2nd ed. New York, USA: Springer.
10. Grueber, C. E., Nakagawa, S., Laws, R. J. & Jamieson, I. G. 2011 Multimodel inference in ecology and evolution : challenges and solutions. *J. Evol. Biol.* **24**, 699–711. (doi:10.1111/j.1420-9101.2010.02210.x)
11. Barton, K. 2015 MuMIn: Multi-model inference.
