# Supplementary material
Source: PubMed Central journal article supplement (PMC5014031)
Supplement: rsbl20160365supp2.pdf [file rsbl20160365supp2.pdf]

## Nepotism and subordinate tenure in a cooperative breeder

Data Table 1

| Subordinate | Group | Sex | Tenure length | Dominance |
|-------------|-------|-----|---------------|-----------|
| 1           | 26    | M   | 1185          | 1         |
| 2           | 15    | M   | 753           | 1         |
| 3           | 21    | F   | 400           | 1         |
| 4           | 22    | F   | 651           | 1         |
| 5           | 24    | F   | 490           | 1         |
| 6           | 8     | M   | 60            | 0         |
| 6           | 22    | M   | 149           | 0         |
| 7           | 3     | M   | 775           | 1         |
| 8           | 24    | F   | 833           | 1         |
| 9           | 4     | F   | 829           | 1         |
| 10          | 13    | M   | 156           | 0         |
| 10          | 17    | M   | 54            | 0         |
| 11          | 7     | F   | 493           | 1         |
| 12          | 9     | M   | 1028          | 1         |
| 13          | 15    | F   | 457           | 1         |
| 14          | 23    | F   | 937           | 1         |
| 15          | 4     | F   | 302           | 1         |
| 16          | 28    | F   | 650           | 1         |
| 17          | 5     | M   | 1060          | 1         |
| 18          | 3     | M   | 590           | 1         |
| 19          | 24    | F   | 610           | 1         |
| 20          | 29    | F   | 634           | 0         |
| 21          | 31    | M   | 29            | 0         |
| 22          | 11    | F   | 45            | 1         |
| 23          | 1     | M   | 74            | 1         |
| 24          | 30    | M   | 1098          | 0         |
| 25          | 5     | M   | 400           | 0         |
| 26          | 29    | M   | 525           | 1         |
| 27          | 24    | M   | 2330          | 1         |
| 28          | 19    | F   | 358           | 1         |
| 29          | 13    | F   | 268           | 0         |
| 30          | 16    | F   | 522           | 1         |
| 31          | 21    | F   | 1293          | 1         |
| 32          | 15    | F   | 748           | 1         |
| 33          | 15    | M   | 667           | 0         |
| 33          | 17    | M   | 20            | 1         |
| 34          | 18    | M   | 110           | 0         |
| 34          | 20    | M   | 141           | 0         |
| 34          | 22    | M   | 824           | 1         |
| 35          | 9     | F   | 706           | 1         |
| 36          | 15    | M   | 1363          | 1         |
| 37          | 20    | F   | 1051          | 0         |
| 37          | 30    | F   | 365           | 1         |
| 38          | 20    | F   | 789           | 1         |
| 39          | 24    | F   | 1049          | 1         |
| 40          | 23    | M   | 1093          | 1         |

| Subordinate | Group | Sex | Tenure length | Dominance |
|-------------|-------|-----|---------------|-----------|
| 41          | 30    | F   | 985           | 0         |
| 42          | 14    | F   | 39            | 1         |
| 43          | 31    | F   | 77            | 0         |
| 44          | 5     | M   | 422           | 0         |
| 45          | 23    | M   | 1097          | 1         |
| 46          | 29    | M   | 1296          | 1         |
| 47          | 20    | F   | 263           | 1         |
| 48          | 6     | F   | 242           | 1         |
| 48          | 15    | F   | 854           | 0         |
| 49          | 24    | F   | 1048          | 1         |
| 50          | 9     | F   | 235           | 0         |
| 51          | 20    | M   | 362           | 0         |
| 52          | 5     | F   | 921           | 1         |
| 53          | 24    | F   | 936           | 1         |
| 54          | 2     | F   | 670           | 1         |
| 55          | 29    | F   | 143           | 0         |
| 56          | 15    | M   | 199           | 0         |
| 57          | 6     | M   | 367           | 1         |
| 58          | 31    | M   | 690           | 1         |
| 59          | 22    | F   | 604           | 1         |
| 60          | 20    | M   | 1239          | 1         |
| 61          | 15    | M   | 372           | 0         |
| 62          | 20    | M   | 976           | 1         |
| 63          | 14    | F   | 1372          | 1         |
| 64          | 23    | M   | 420           | 0         |
| 65          | 21    | F   | 533           | 1         |
| 66          | 2     | M   | 560           | 1         |
| 67          | 12    | F   | 241           | 0         |
| 67          | 29    | F   | 240           | 0         |
| 68          | 14    | M   | 664           | 1         |
| 69          | 23    | M   | 1066          | 1         |
| 70          | 22    | M   | 58            | 0         |
| 71          | 31    | M   | 931           | 1         |
| 72          | 23    | F   | 15            | 1         |
| 72          | 24    | F   | 367           | 0         |
| 73          | 25    | F   | 727           | 1         |
| 74          | 15    | M   | 359           | 0         |
| 75          | 15    | M   | 791           | 1         |
| 76          | 24    | M   | 886           | 1         |
| 77          | 15    | F   | 723           | 1         |
| 78          | 10    | F   | 24            | 0         |
| 79          | 16    | F   | 684           | 1         |
| 80          | 21    | M   | 206           | 0         |
| 80          | 29    | M   | 707           | 0         |
| 81          | 5     | F   | 1549          | 1         |
| 82          | 21    | F   | 432           | 1         |
| 83          | 20    | M   | 143           | 0         |
| 84          | 5     | M   | 424           | 0         |
| 85          | 3     | F   | 799           | 0         |

| Subordinate | Group | Sex | Tenure length | Dominance |
|-------------|-------|-----|---------------|-----------|
| 86          | 16    | F   | 643           | 0         |
| 86          | 31    | F   | 65            | 1         |
| 87          | 14    | F   | 57            | 1         |
| 87          | 31    | F   | 969           | 0         |
| 88          | 20    | F   | 788           | 1         |
| 88          | 27    | F   | 50            | 0         |
| 89          | 31    | M   | 1027          | 1         |
| 90          | 21    | F   | 413           | 1         |

Data table 2

| Sex | Natal group | Group | Unrelated dominant | Age at start | Group size | Tenure |
|-----|-------------|-------|--------------------|--------------|------------|--------|
| M   | y           | 1     | opp                | 365          | L          | 380    |
| F   | y           | 1     | same               | 294          | M          | 376    |
| M   | y           | 1     | opp                | 376          | L          | 184    |
| M   | y           | 2     | opp                | 334          | S          | 441    |
| F   | y           | 2     | same               | 365          | M          | 434    |
| F   | y           | 3     | same               | 648          | M          | 377    |
| M   | y           | 4     | opp                | 935          | L          | 125    |
| F   | y           | 4     | same               | 337          | S          | 256    |
| F   | y           | 4     | same               | 676          | M          | 245    |
| M   | y           | 4     | opp                | 230          | M          | 194    |
| M   | n           | 5     | same               | 378          | S          | 10     |
| F   | n           | 6     | opp                | 1351         | S          | 45     |
| F   | n           | 7     | same               | 244          | S          | 206    |
| M   | n           | 7     | opp                | 707          | S          | 206    |
| F   | y           | 8     | same               | 303          | L          | 500    |
| M   | y           | 8     | opp                | 303          | M          | 203    |
| M   | y           | 8     | opp                | 171          | S          | 493    |
| F   | y           | 8     | same               | 218          | L          | 519    |
| F   | y           | 8     | same               | 365          | L          | 282    |
| M   | n           | 9     | opp                | 400          | M          | 366    |
| F   | y           | 10    | opp                | 287          | M          | 348    |
| F   | y           | 10    | opp                | 287          | L          | 259    |
| F   | y           | 10    | same               | 774          | M          | 202    |
| M   | y           | 10    | opp                | 511          | M          | 156    |
| M   | y           | 10    | opp                | 1273         | M          | 90     |
| M   | y           | 10    | opp                | 128          | M          | 663    |
| F   | y           | 11    | same               | 210          | M          | 132    |
| F   | y           | 11    | same               | 210          | M          | 132    |
| F   | y           | 11    | opp                | 307          | S          | 215    |
| F   | y           | 11    | same               | 210          | M          | 474    |
| F   | y           | 11    | same               | 252          | M          | 391    |
| M   | n           | 12    | same               | 375          | S          | 175    |
| M   | n           | 13    | opp                | 345          | S          | 63     |
| M   | n           | 14    | opp                | 434          | M          | 464    |
| M   | n           | 15    | opp                | 146          | S          | 110    |
| M   | y           | 16    | same               | 143          | M          | 174    |
| F   | y           | 17    | same               | 368          | L          | 0      |
| F   | n           | 17    | opp                | 366          | L          | 379    |
| F   | y           | 17    | same               | 368          | L          | 1127   |
| F   | y           | 17    | opp                | 365          | S          | 263    |
| M   | y           | 17    | same               | 976          | L          | 0      |
| F   | y           | 17    | same               | 398          | L          | 0      |
| F   | y           | 17    | same               | 368          | L          | 255    |
| M   | y           | 17    | same               | 756          | L          | 0      |
| F   | y           | 18    | opp                | 58           | L          | 342    |
| M   | y           | 18    | same               | 481          | M          | 169    |
| F   | y           | 18    | opp                | 117          | L          | 1176   |

| Sex | Natal group | Group | Unrelated dominant | Age at start | Group size | Tenure |
|-----|-------------|-------|--------------------|--------------|------------|--------|
| F   | y           | 18    | opp                | 231          | M          | 295    |
| F   | y           | 18    | opp                | 481          | M          | 52     |
| F   | y           | 18    | opp                | 478          | S          | 419    |
| F   | y           | 18    | opp                | 58           | M          | 374    |
| F   | y           | 18    | same               | 365          | S          | 48     |
| F   | y           | 19    | opp                | 43           | M          | 608    |
| F   | y           | 19    | opp                | 242          | L          | 506    |
| F   | y           | 20    | same               | 132          | L          | 805    |
| M   | y           | 20    | opp                | 365          | L          | 728    |
| M   | y           | 20    | opp                | 132          | L          | 934    |
| F   | n           | 20    | opp                | 367          | M          | 15     |
| F   | y           | 21    | same               | 149          | L          | 684    |
| F   | y           | 21    | same               | 379          | M          | 231    |
| M   | y           | 21    | opp                | 491          | M          | 1837   |
| F   | y           | 21    | same               | 370          | L          | 679    |
| F   | y           | 21    | same               | 71           | M          | 1116   |
| F   | y           | 22    | opp                | 359          | S          | 368    |
| M   | y           | 23    | opp                | 528          | M          | 657    |
| F   | n           | 24    | same               | 493          | S          | 50     |
| M   | y           | 25    | opp                | 318          | L          | 191    |
| F   | y           | 25    | opp                | 365          | S          | 671    |
| F   | y           | 25    | same               | 607          | L          | 27     |
| M   | y           | 25    | opp                | 438          | L          | 87     |
| F   | y           | 25    | same               | 318          | M          | 204    |
| M   | y           | 25    | opp                | 261          | L          | 201    |
| M   | y           | 26    | opp                | 714          | S          | 414    |
| F   | n           | 26    | opp                | 1058         | M          | 365    |
| F   | y           | 26    | same               | 714          | M          | 301    |
| M   | y           | 27    | opp                | 109          | L          | 54     |
| M   | n           | 27    | same               | 1048         | M          | 29     |
| F   | y           | 27    | same               | 800          | L          | 146    |
| M   | y           | 27    | opp                | 159          | M          | 531    |
| M   | y           | 27    | opp                | 800          | L          | 131    |
| F   | y           | 27    | same               | 929          | L          | 40     |

Data table 3

| Sex | Relatedness | Tenure (adjusted) |                          |
|-----|-------------|-------------------|--------------------------|
| F   | C           | 0                 | A Both related           |
| M   | A           | 267               | B Opposite-sex unrelated |
| M   | B           | 657               | C Same-sex unrelated     |
| F   | A           | 363               | D Both unrelated         |
| M   | A           | 309               |                          |
| F   | B           | 342               |                          |
| F   | A           | 82                |                          |
| F   | B           | 608               |                          |
| F   | A           | 932               |                          |
| M   | B           | 191               |                          |
| F   | A           | 46                |                          |
| M   | C           | 169               |                          |
| F   | B           | 348               |                          |
| M   | B           | 441               |                          |
| F   | B           | 671               |                          |
| F   | C           | 684               |                          |
| F   | A           | 385               |                          |
| M   | D           | 156               |                          |
| F   | B           | 259               |                          |
| F   | D           | 493               |                          |
| F   | C           | 132               |                          |
| M   | A           | 584               |                          |
| F   | D           | 22                |                          |
| F   | D           | 5                 |                          |
| M   | B           | 54                |                          |
| M   | D           | 23                |                          |
| F   | C           | 805               |                          |
| F   | D           | 19                |                          |
| F   | D           | 302               |                          |
| F   | C           | 132               |                          |
| F   | A           | 206               |                          |
| F   | C           | 202               |                          |
| M   | B           | 125               |                          |
| F   | A           | 271               |                          |
| M   | A           | 146               |                          |
| F   | C           | 231               |                          |
| F   | C           | 27                |                          |
| M   | C           | 29                |                          |
| M   | D           | 130               |                          |
| F   | A           | 406               |                          |
| M   | D           | 74                |                          |
| F   | D           | 323               |                          |
| M   | B           | 414               |                          |
| F   | A           | 275               |                          |
| M   | B           | 366               |                          |
| M   | B           | 87                |                          |
| M   | B           | 1837              |                          |

| Sex | Relatedness | Tenure (adjusted) |
|-----|-------------|-------------------|
| F   | D           | 0                 |
| F   | C           | 204               |
| F   | C           | 256               |
| F   | B           | 215               |
| F   | B           | 1176              |
| F   | B           | 379               |
| F   | A           | 304               |
| M   | D           | 152               |
| M   | B           | 156               |
| F   | C           | 1127              |
| M   | B           | 201               |
| M   | A           | 464               |
| M   | B           | 110               |
| F   | C           | 146               |
| F   | A           | 877               |
| F   | A           | 262               |
| M   | A           | 529               |
| M   | B           | 90                |
| M   | B           | 380               |
| F   | B           | 295               |
| F   | C           | 500               |
| F   | A           | 607               |
| F   | B           | 506               |
| F   | A           | 345               |
| F   | C           | 679               |
| M   | B           | 728               |
| F   | C           | 301               |
| F   | D           | 39                |
| F   | A           | 117               |
| M   | A           | 653               |
| M   | A           | 852               |
| F   | B           | 263               |
| F   | A           | 410               |
| F   | A           | 604               |
| M   | B           | 203               |
| F   | D           | 1018              |
| M   | B           | 63                |
| F   | C           | 245               |
| F   | A           | 492               |
| F   | C           | 376               |
| F   | D           | 471               |
| M   | D           | 226               |
| M   | D           | 367               |
| M   | B           | 531               |
| F   | A           | 160               |
| M   | A           | 795               |
| M   | C           | 175               |
| M   | C           | 0                 |
| F   | A           | 928               |

| Sex | Relatedness | Tenure (adjusted) |
|-----|-------------|-------------------|
| M   | B           | 464               |
| F   | B           | 52                |
| M   | B           | 184               |
| F   | C           | 206               |
| F   | C           | 0                 |
| M   | B           | 493               |
| M   | B           | 934               |
| F   | C           | 255               |
| M   | D           | 58                |
| M   | B           | 131               |
| F   | B           | 15                |
| F   | C           | 1116              |
| F   | C           | 377               |
| F   | B           | 368               |
| M   | C           | 10                |
| M   | B           | 663               |
| M   | A           | 442               |
| F   | D           | 13                |
| F   | B           | 419               |
| F   | C           | 474               |
| F   | D           | 13                |
| M   | A           | 263               |
| F   | D           | 1440              |
| F   | B           | 374               |
| M   | D           | 137               |
| M   | B           | 194               |
| F   | C           | 519               |
| F   | C           | 434               |
| F   | C           | 391               |
| F   | D           | 578               |
| F   | C           | 40                |
| F   | D           | 276               |
| F   | C           | 282               |
| F   | A           | 119               |
| M   | A           | 583               |
| M   | C           | 174               |
| F   | C           | 48                |
| M   | C           | 0                 |
